# Supplementary material
Source: PubMed Central journal article supplement (PMC3477232)
Supplement: supp_mol.112.079863_Suppl._MOL79863.pdf [file supp_mol.112.079863_Suppl._MOL79863.pdf]

**MOL#79863**

**Critical role for mixed-lineage kinase 3 in acetaminophen-induced hepatotoxicity**

**Manju Sharma, Vidya Gadang and Anja Jaeschke**

**Molecular Pharmacology**

**Supplemental Figure 1**

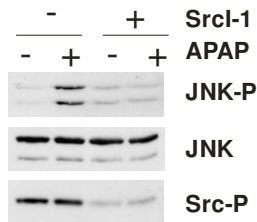

**Fig. S1: Role of Src in APAP-induced JNK activation.** Primary mouse hepatocytes were treated with 5 mM APAP in the presence or absence of 5  $\mu$ M Src inhibitor (Src1-1) for 6 h. Expression and phosphorylation of JNK and phosphorylation of Src were examined by immunoblot analysis. Shown are representative data from 2 independent experiments.
